# 1 CIGAR-seq, a CRISPR/Cas-based method 2 for unbiased screening of novel mRNA 3 modification regulators

4 Liang Fang<sup>1,2#</sup>, Wen Wang<sup>1,3#</sup>, Guipeng Li<sup>1,2#</sup>, Li Zhang<sup>1</sup>, Jun Li<sup>1</sup>, Diwen Gan<sup>1</sup>, Jiao  
5 Yang<sup>1</sup>, Yisen Tang<sup>1</sup>, Zewen Ding<sup>1</sup>, Min Zhang<sup>1</sup>, Wenhao Zhang<sup>1</sup>, Daqi Deng<sup>1</sup>, Zhengyu  
6 Song<sup>1</sup>, Qionghua Zhu<sup>1</sup>, Huanhuan Cui<sup>1,2</sup>, Yuhui Hu<sup>1</sup>, Wei Chen<sup>1,2,\*</sup>

7 1. Department of Biology, Southern University of Science and Technology, Shenzhen,  
8 Guangdong 518005, China

9 2. Academy for Advanced Interdisciplinary Studies, Southern University of Science  
10 and Technology, Shenzhen, Guangdong 518005, China

11 3. Harbin Institute of Technology, Harbin, Heilongjiang 150001, China

12

13 # These authors contributed equally to this work

14 \* Corresponding author. Tel: +86 755 88018449; E-mail: chenw@sustech.edu.cn

15

16 Keywords: CIGAR-seq, CRISPR/Cas-based screening, mRNA modification

17 **Abstract**

18 Cellular RNA is decorated with over 170 types of chemical modifications. Many modifications in mRNA,  
19 including m<sup>6</sup>A and m<sup>5</sup>C, have been associated with critical cellular functions under physiological and/or  
20 pathological conditions. To understand the biological functions of these modifications, it is vital to identify  
21 the regulators that modulate the modification rate. However, a high-throughput method for unbiased  
22 screening of these regulators is so far lacking. Here, we report such a method combining pooled  
23 CRISPR screen and reporters with RNA modification readout, termed C RISPR integrated gRNA and  
24 reporter sequencing (CIGAR-seq). Using CIGAR-seq, we discovered NSUN6 as a novel mRNA m<sup>5</sup>C  
25 methyltransferase. Subsequent mRNA bisulfite sequencing in HAP1 cells without or with NSUN6 and/or  
26 NSUN2 knockout showed that NSUN6 and NSUN2 worked on non-overlapping subsets of mRNA m<sup>5</sup>C  
27 sites, and together contributed to almost all the m<sup>5</sup>C modification in mRNA. Finally, using m<sup>1</sup>A as an  
28 example, we demonstrated that CIGAR-seq can be easily adapted for identifying regulators of other  
29 mRNA modification.

## 30 Introduction

31 Cellular RNAs can be chemically modified in over a hundred different ways, and such modifications  
32 have been associated with diverse cellular functions under physiological and/or pathological conditions  
33 (Machnicka, Milanowska et al., 2013, Roundtree, Evans et al., 2017). To achieve so called dynamic  
34 epitranscriptomic regulation, each modification needs its distinct deposition, removal and recognition  
35 factors (termed 'writers', 'erasers' and 'readers', respectively). Yet, comparing to the ever-expanding  
36 techniques on detecting RNA modifications (Zhao, Song et al., 2020), the methods to systematically  
37 identify writers and erasers of RNA modifications are rather limited. For instance, the first N6-adenosine  
38 ( $m^6A$ ) methyltransferase METTL3 was identified through a combination of in vitro assay, conventional  
39 chromatography, electrophoresis and microsequencing (Bokar, Rath-Shambaugh et al., 1994, Bokar,  
40 Shambaugh et al., 1997), and the second  $m^6A$  methyltransferase METTL14 was discovered through the  
41 phylogenetic analysis based on METTL3 (Liu, Yue et al., 2014). In general, the first strategy is less  
42 efficient and may have assay-specific bias, while the second strategy relies on the prior knowledge of  
43 related molecule(s). So far, unbiased method to screen for novel regulators of RNA modifications is still  
44 lacking.

45  
46 Recently, the rapid development of CRISPR-based gene manipulation provides a new paradigm for  
47 high-throughput and genome-wide functional screening. Pooled CRISPR screen outperforms array-  
48 based screen by its scalability and low cost, however, was largely restricted to standard readouts,  
49 including survival, proliferation and FACS-sortable markers (Hanna & Doench, 2020). Most recently,  
50 combining with microscopy-based approaches, CRISPR screen enabled the association of subcellular  
51 phenotypes with perturbation of specific gene(s) (Wheeler, Vu et al., 2020, Yan, Stuurman et al., 2020).  
52 In studying regulation of gene expression, Perturb-seq, CRISP-seq and CROP-seq, which combine  
53 CRISPR-based gene editing with single-cell mRNA sequencing, allowed transcriptome profile to serve  
54 as comprehensive molecular readout (Adamson, Norman et al., 2016, Datlinger, Rendeiro et al., 2017,  
55 Dixit, Parnas et al., 2016), but often with limited throughput. Until now, pooled CRISPR screen with  
56 epitranscriptomic readout has not yet been developed.

57  
58 One important RNA modification, 5-methylcytosine ( $m^5C$ ), was first identified in stable and highly  
59 abundant tRNA and rRNA (Agris, 2008, Helm, 2006, Schaefer, Pollex et al., 2009). Subsequently, many  
60 novel  $m^5C$  sites in mRNA were discovered by using next-generation sequencing-based methods,

61 including mRNA bisulfite sequencing (mRNA-BisSeq) (Schaefer et al., 2009, Squires, Patel et al., 2012),  
62 m<sup>5</sup>C-RNA immunoprecipitation (RIP) (Edelheit, Schwartz et al., 2013), 5-azacytidine-mediated RNA  
63 immunoprecipitation (Aza-IP) (Khoddami & Cairns, 2013) and methylation-individual-nucleotide-  
64 resolution crosslinking and immunoprecipitation (miCLIP) (Hussain, Sajini et al., 2013). The m<sup>5</sup>C  
65 modification has been reported to regulate the structure, stability and translation of mRNAs (Guallar, Bi  
66 et al., 2018, Li, Li et al., 2017, Luo, Feng et al., 2016, Schumann, Zhang et al., 2020, Shen, Zhang et  
67 al., 2018), and be catalyzed by NOP2/Sun RNA methyltransferase family member 2 (NSUN2) (David,  
68 Burgess et al., 2017, Khoddami & Cairns, 2013, Yang, Yang et al., 2017a). However, recent studies  
69 have shown that, even after NSUN2 knockout (KO), a significant number of m<sup>5</sup>C sites in mRNA  
70 remained methylated (Huang, Chen et al., 2019, Trixl & Lusser, 2019), suggesting the existence of  
71 additional methyltransferase(s) involved in mRNA m<sup>5</sup>C modification. To fully appreciate the function of  
72 this modification, it would be important to identify the remaining methyltransferase(s).

73

74 Here, we report a method combining pooled CRISPR screen and a reporter with epitrancriptomic  
75 readout, termed CRISPR integrated gRNA and reporter sequencing (CIGAR-seq). Using CIGAR-seq  
76 with a reporter containing a m<sup>5</sup>C modification site, we screening through a gRNA library targeting 829  
77 RNA-binding proteins and identified NSUN6 as a novel m<sup>5</sup>C writer of mRNA. mRNA-BisSeq in HAP1  
78 cells without or with NSUN6 and/or NSUN2 knockout showed NSUN6 and NSUN2 worked on non-  
79 overlapping subsets of mRNA m<sup>5</sup>C sites, and together contributed to almost all the m<sup>5</sup>C modification in  
80 mRNA. Finally, using m<sup>1</sup>A as an example, we demonstrated that CIGAR-seq can be easily adapted for  
81 studying other mRNA modification.



## 82 **Results**

### 83 **CIGAR-seq: Pooled CRISPR screening with a epitranscriptomic readout**

84 In CIGAR-seq, to integrate pooled CRISPR screening with a epitranscriptomic readout, here more  
85 specifically m<sup>5</sup>C modification readout, we adopted the previously developed CROP-seq method  
86 (Datlinger et al., 2017) and replaced the WPRE cassette on the original vector by an endogenous m<sup>5</sup>C  
87 site with its flanking region (Fig 1A). Thereby, the mRNA molecules transcribed from this lentiviral vector  
88 contain a selection marker followed by an endogenous m<sup>5</sup>C site, a U6 promoter and a gRNA sequence.  
89 To detect the m<sup>5</sup>C level in the gRNA sequence-containing transcripts, total mRNA was firstly subjected  
90 to bisulfite treatment followed by reverse transcription. Subsequently, a primer pair flanking the m<sup>5</sup>C site  
91 and gRNA sequence was used to amplify the region for Sanger or next-generation sequencing (Fig 1A).  
92 In this way, the methylation level of the m<sup>5</sup>C reporter site can be measured and associated with the  
93 gRNA targeting a specific gene.

94

95 As a proof-of-concept experiment, a known NSUN2-dependent m<sup>5</sup>C site in FAM129B (also known as  
96 NIBAN2) gene was cloned into CIGAR-seq vector, together with a control gRNA without any target gene  
97 or a gRNA targeting NSUN2 (Fig 1B, upper panel). Seven days after transduction into Cas9-expressing  
98 HAP1 cells, m<sup>5</sup>C modification level on the reporter transcripts was measured. The result demonstrated  
99 that, upon NSUN2 perturbation (Fig EV1A), the m<sup>5</sup>C modification rate reduced significantly in the  
100 reporter containing NSUN2 targeting gRNAs (Fig 1B, lower panel), whereas the modification remained  
101 intact in the reporter containing the control gRNA (Fig 1B, upper panel).

102

### 103 **CIGAR-seq identified NSUN6 as a novel mRNA methyltransferase**

104 As suggested by previous studies that large amount of m<sup>5</sup>C sites in mRNA remained methylated after  
105 NSUN2 knockout (Huang et al., 2019, Trixl & Lusser, 2019), we sought to utilize CIGAR-seq to identify  
106 gene(s) that mediate the m<sup>5</sup>C modification on NSUN2-independent sites. First, to determine the NSUN2-  
107 independent m<sup>5</sup>C sites, we established NSUN2 knockout (NSUN2-KO) HAP1 cells (Fig EV4A), and  
108 performed mRNA bisulfite sequencing (mRNA-BisSeq) in wildtype as well as NSUN2-KO cells.  
109 Following bioinformatic pipeline proposed by Huang et al. (Huang et al., 2019), a set of 208 m<sup>5</sup>C sites  
110 was identified in wildtype HAP1 cells (Methods), only 90 (43.3%) of which showed significantly reduced  
111 m<sup>5</sup>C level in NSUN2-KO cells (Fig EV1B).

112

113 We then chose a NSUN2-independent site in the 3'UTR of FURIN gene with a high m<sup>5</sup>C modification  
114 rate as the reporter site for CIGAR-seq. Meanwhile, a gRNA library targeting 829 RNA binding proteins  
115 (RBP) was synthesized (Table EV1). To establish the CIGAR-seq vector pool for the genetic screen,  
116 the gRNA library was firstly cloned into the vector followed by the insertion of the FURIN m<sup>5</sup>C site with  
117 its flanking genomic region (Methods). Cas9-expressing HAP1 cells were then transduced with CIGAR-  
118 seq virus pool (Fig 1C, Methods). Seven days after transduction, cells were collected and subjected to  
119 RNA extraction. Enriched polyA RNA was then bisulfite-treated, reverses-transcribed and PCR-amplified  
120 using primers flanking the m<sup>5</sup>C site and gRNA sequence to generate next-generation sequencing (NGS)  
121 library (Methods). After pair-end sequencing and data processing, 811 genes were detected with at least  
122 one gRNA, of which 782 genes had at least two gRNAs (Fig EV1C). The m<sup>5</sup>C modification rate of  
123 reporter site was calculated for each gRNA. While the median m<sup>5</sup>C modification rates of gRNA-  
124 associated reporter sites were around 93.5%, a small part of gRNAs showed significantly reduced m<sup>5</sup>C  
125 rates (Fig EV1D). To prioritize the candidate genes, Stouffer's method was used to calculate the  
126 combined P value based on the gRNAs targeting the same gene (Methods). As shown in Fig 1D, it  
127 turned out that NSUN6, a member of NOL1/NOP2/sun domain (NSUN) family, was identified as the best  
128 hit (Fig 1D). Interestingly, NSUN6 was previously reported to introduce the m<sup>5</sup>C in tRNA (Li, Li et al.,  
129 2019). However, two previous studies did not show significant m<sup>5</sup>C changes in mRNA after NSUN6  
130 perturbation in HeLa cells (Huang et al., 2019, Yang et al., 2017a).

131

132 To validate our result, a gRNA targeting NSUN6 was inserted into the CIGAR-seq vector containing the  
133 FURIN m<sup>5</sup>C site. As shown in Figure 1E, perturbation of NSUN6 (Fig EV2A) indeed reduced the m<sup>5</sup>C  
134 level in both reporter mRNA and endogenous NSUN2-independent m<sup>5</sup>C site in RPSA gene (Fig 1E, left  
135 and middle panels). Furthermore, to rule out the potential off-target effect of gRNA, we repressed  
136 NSUN6 expression using shRNA (Fig EV2B). Again, the m<sup>5</sup>C level at the endogenous site was also  
137 reduced in cells with NSUN6 repression (Fig 1E, right panel). Together, these results confirmed NSUN6  
138 as a bona fide mRNA m<sup>5</sup>C methyltransferase.

139

#### 140 **Global profiling of NSUN6-dependent m<sup>5</sup>C sites**

141 To globally characterize NSUN6-dependent m<sup>5</sup>C sites, we established NSUN6 knockout (NSUN6-KO)  
142 HAP1 cells (Fig EV4B) and performed mRNA-BisSeq. Of 208 m<sup>5</sup>C sites identified in wildtype HAP1 cells,

143 65 (31.2%) showed significant reduction at m<sup>5</sup>C level in NSUN6-KO cells (Fig 2A). To illustrate the  
144 features of sequence flanking NSUN6-dependent m<sup>5</sup>C sites in HAP1 cells, motif analysis was performed  
145 based on the upstream and downstream 10 nucleotide sequences flanking the m<sup>5</sup>C sites. As shown in  
146 Figure 2B, NSUN6-dependent m<sup>5</sup>C sites were embedded in slightly GC-rich environments with a  
147 strongly enriched TCCA motif at 3' of m<sup>5</sup>C sites. Previously, a similar 3' TCCA motif was also found at  
148 NSUN6 target sites in tRNAs (Li et al., 2019), and has also been proposed as sequence motif around  
149 NSUN2-independent sites in another study (Huang et al., 2019). In comparison, the sequence feature  
150 around NSUN2-dependent m<sup>5</sup>C sites is distinct, which is enrich for 3' NGGG motif (Huang et al., 2019,  
151 Yang, Yang et al., 2017b).

152

### 153 **Contribution of NSUN6 and NSUN2 to the mRNA m<sup>5</sup>C modification**

154 We then evaluated the relative contribution of NSUN6 and NSUN2 to the global mRNA m<sup>5</sup>C modification.  
155 First, comparing between NSUN2- and NSUN6-dependent m<sup>5</sup>C sites, as shown in Figure 3A, these  
156 sites were largely non-overlapping, suggesting their non-redundant biological functions. Then, to further  
157 examine whether NSUN2 and NSUN6 together are responsible for all mRNA m<sup>5</sup>C modifications, NSUN2  
158 and NSUN6 double KO (NSUN2/6-dKO) HAP1 cells were established (Fig EV4C) and subjected to  
159 mRNA-BisSeq analysis. As shown in Figure 3B, the modification of m<sup>5</sup>C sites depend only on NSUN6  
160 or NSUN2 (62 and 87, respectively) were also abolished in NSUN2/6-dKO cells. While NSUN6-  
161 dependent sites were strongly enriched for 3' TCCA motif as shown earlier, NSUN2-dependent sites  
162 were enriched for 3' NGGG motif as previously reported (Huang et al., 2019, Yang et al., 2017b) (Fig  
163 3C). Furthermore, we carefully examined the three sites that showed dependence on both NSUN6 and  
164 NSUN2, as well as the 56 sites that were independent of both NSUN6 and NSUN2. Comparing to the  
165 other three groups, the group of three overlapping sites had very low m<sup>5</sup>C level (Fig 3D). In addition, the  
166 m<sup>5</sup>C sites in ANGEL1 and ZNF707 possessed a 3' TCCA and a 3' AGGG motif, respectively (Fig  
167 EV3A&B), suggesting they are very likely a NSUN6- and a NSUN2-dependent site, respectively, but  
168 with low m<sup>5</sup>C level that led to false negative findings in the mRNA-BisSeq analysis of some but not all  
169 the samples. The remaining m<sup>5</sup>C site in STRN4 was embedded within a cluster of "pseudo" m<sup>5</sup>C sites  
170 (Fig EV3C), which was highly likely an artifact due to the incomplete bisulfite conversion as suggested  
171 before (Haag, Warda et al., 2015, Huang et al., 2019). Similarly, the group of 56 NSUN2/6-independent  
172 sites were also highly enriched for such clusters of pseudo m<sup>5</sup>C sites: 52 sites had at least one pseudo  
173 m<sup>5</sup>C site in vicinity (Table EV2). The remaining four sites all had very low m<sup>5</sup>C level.

174

175 To explore the modification rate of NSUN6/2-dependent m<sup>5</sup>C sites across different tissues, we resorted  
176 to mRNA-BisSeq data from a previous study (Huang et al., 2019). As shown in Figure 3E, m<sup>5</sup>C  
177 modification on 47 NSUN6- and 66 NSUN2-dependent m<sup>5</sup>C sites could also be observed in other human  
178 tissue(s). While the modification rate of NSUN6-dependent sites was by and large highest in liver,  
179 NSUN2-dependent ones did not show such tissue biases (Fig 3E).

180

### 181 **CIGAR-seq could be used for the study of other mRNA modification**

182 Finally, to explore the potential application of CIGAR-seq in the study of other mRNA modifications, we  
183 turned to N-1-methyladenosine (m<sup>1</sup>A). As N-1-methyladenosine (m<sup>1</sup>A) can cause mis-incorporation  
184 during cDNA synthesis (Hauenschild, Tserovski et al., 2015), its modification can be detected by direct  
185 cDNA sequencing. Similar as the previous NSUN2 proof-of-concept experiment, we chose a well-  
186 characterized m<sup>1</sup>A site from MALAT1, which is known to be modified by TRMT6/TRMT61A complex  
187 (Dominissini, Nachtergaele et al., 2016, Li, Xiong et al., 2017, Safra, Sas-Chen et al., 2017). We cloned  
188 the site and its flanking region into CIGAR-seq vector with a control gRNA and two gRNAs targeting  
189 TRMT6/TRMT61A complex, respectively (Fig 4A). As shown in Figure 4C, in HAP1 cells with  
190 perturbation of either TRMT6 or TRMT61A (Fig 4B), the m<sup>1</sup>A modification of the reporter site was  
191 completely abolished, whereas in cells transduced with control gRNAs, the modification remains intact.

## 192 **Discussion**

193 Combining pooled CRISPR screening strategy and a reporter with epitranscriptomic readout, CIGAR-  
194 seq for the first time enables the unbiased screening for novel regulators of mRNA modifications. In this  
195 study, we demonstrated its power in identification of NSUN6 as a novel mRNA m<sup>5</sup>C methyltransferase.  
196 In addition, we also showed its potential application in studying m<sup>1</sup>A modification. Integrating additional  
197 modification readout strategies into our pipeline, it could be further adapted to investigate other  
198 modifications. For instance, we can use CIGAR-seq to search for potential regulators of RNA editing by  
199 simply reading the A-G or C-T changes in the cDNA sequence reads derived from A-I or C-U RNA  
200 editing reporters. m<sup>6</sup>A-iCLIP (Linder, Grozhik et al., 2015) or SELECT (Xiao, Wang et al., 2018) method,  
201 which were used to measure the modification rate of individual m<sup>6</sup>A site, could also be integrated into  
202 our CIGAR-seq in analyzing m<sup>6</sup>A regulators. Furthermore, changing reporters to those with other  
203 regulatory readout, for example alternative splicing or alternative polyadenylation pattern, the potential  
204 application of CIGAR-seq could be easily extended to screen for factors involved in diverse post-  
205 transcriptional regulations. There, given the readout is based on directly measuring the reporter-derived  
206 RNAs, CIGAR-seq would be in principle superior to current fluorescence-reporter-FACS based  
207 screening strategies.

208

209 Like any other high-throughput assays, CIGAR-seq has also its own sensitivity and specificity issues,  
210 which could be affected by the choice of reporter and CRISPR system. The reporter could affect its  
211 performance in two ways. First, the high or low modification level of the reporter site could result in  
212 biased performance in detecting positive or negative regulators. For example, in this study, our m<sup>5</sup>C site  
213 from FURIN genes has a very high modification rate. At this level, it would be much more sensitive in  
214 finding the decrease of methylation rate, therefore be much easier to discover the methyltransferase  
215 than potential demethylase if any in this case. In contrast, the use of reporter site with low modification  
216 rate would not be preferable in identifying methyltransferase. Second, except writer and eraser, most  
217 regulators may modulate the modification level through binding to the cis-regulatory elements, which  
218 are not necessarily in direct vicinity of the target site. A reporter construct with a limited length might not  
219 be able to include all the relevant cis-elements. Consequently, we would fail to identify the regulators  
220 with binding sites missed in the reporter. On the other hand, the CIGAR-seq vector itself may contain  
221 artificial regulatory sequences affecting the modification of reporter site, which could result in the assay-  
222 specific artifacts. Therefore, subsequent careful validation with endogenous sites would be essential

223 when working with the CIGAR-seq. The choice of CRISPR system could also have an effect. The  
224 screening based on CRISPR/Cas9 system, as applied in this study, would have limitations in finding  
225 potential regulators that are essential for cell survival and/or proliferation (e.g. METTL3/METTL14) since  
226 the gRNAs targeted at those essential genes would be largely depleted in the final sequencing library.  
227 This problem could be potentially alleviated by adopting CRISPRi or CRISPRa systems. In the future,  
228 with further improvements in CRISPR system and development of more sequencing-based readout with  
229 high precision, CIGAR-seq will become a versatile tool for systematic discoveries of players in multiple  
230 layer of RNA-based post-transcriptional gene regulation.

## 231 **Methods**

### 232 **Experimental methods**

#### 233 **Cell culture and gene manipulation**

234 HAP1 cell was obtained from Horizon discovery and cultured in RPMI1640 medium (22400089, Gibco)  
235 with 10% FBS (10270106, Gibco) and 1% P/S (15070063, Gibco) at 37°C with 5% CO<sub>2</sub>. Cas9-  
236 expressing HAP1 cell line was established by using lentiCas9-Blast plasmid (#52962, Addgene). To  
237 generate NSUN2-KO, NSUN6-KO and NSUN2/6-dKO clonal HAP1 cells, Cas9-expressing HAP1 cells  
238 were transduced with CROP-seq (Addgene, #86708) virus expressing following gRNAs: gNSUN2, 5'-  
239 GCTGTTTCGAGCACTACTACC-3'; gNSUN6, 5'-GACCTTCAAGATGTGTTACT-3'. NSUN6 knockdown  
240 mediated by shRNA was performed using pLKO.1-blast plasmid (modified from pLKO.1-puro, #10878,  
241 Addgene) with following shRNAs: shControl, 5'-CGTCTGGCTAATAAGGACTCT-3'; shNSUN6-1, 5'-  
242 GCAAAGAAATCTTCAGTGGAT-3'; shNSUN6-2, 5'-GCTGGAGATGTTATTTCTGTA-3'.

243

#### 244 **RT-qPCR**

245 Total RNA was extracted by TRIzol® Reagent (Ambion). First-stand cDNA was synthesized using  
246 HiScript III 1<sup>st</sup> Stand cDNA Synthesis Kit (Vazyme, #R312-02). Quantitative PCR was performed by Hieff  
247 qPCR SYBR Green Master Mix (Yeasen, #11201ES08) and the BIO-RAD real-time PCR system.  
248 Following primers were used to detect relative gene expression: NSUN6-F, 5'-  
249 GGAGCCAAAGAATTTGATGGAACA-3'; NSUN6-R, 5'-ATGCCCATGCCTTTTCAGTTC-3'; GAPDH-F,  
250 5'-AGCCACATCGCTCAGACAC-3'; GAPDH-R, 5'-GCCCAATACGACCAAATCC-3'.

251

#### 252 **CIGAR-seq vector with m<sup>5</sup>C/m<sup>1</sup>A reporters and individual gRNA**

253 Sequence flanking m<sup>5</sup>C site of FAM129B was amplified by forward primer 5'-  
254 GCCTGAACGCGTTAAGTCGAC-GGCTGGACACTGCTGGGG-3' and reverse primer 5'-  
255 GTAAGTCATTGGTCTTAAAGTCGAC-GGGGAAAGCGAGGCTCG-3' from genomic DNA; m<sup>5</sup>C site of  
256 FURIN by forward primer 5'-GCCTGAACGCGTTAAGTCGAC-CCGGCCCCAGCCAGAGTTC-3' and  
257 reverse primer 5'-GTAAGTCATTGGTCTTAAAGTCGAC-TGGTGGAGGCACGGAGCACA-3', and m<sup>1</sup>A  
258 site of MALAT1 by forward primer 5'-GCCTGAACGCGTTAAGTCGAC-  
259 CTTAGTAGGGTCATGAAGGTTTTTCT-3' and reverse primer 5'-  
260 GTAAGTCATTGGTCTTAAAGTCGAC-ATACATCAAGGATGTATATAGTTCAAAGATATTGTGC-3'.

261 Amplified products were used to replace WPRE cassette in CROP-seq vector (Addgene, #86708) by  
262 ClonExpress II One Step Cloning Kit (Vazyme). Afterwards, following gRNAs were inserted at BsmBI  
263 sites to knockout individual genes: gControl, 5'-GAGGGATCGTTAGGAAGGG-3'; gNSUN2, 5'-  
264 GCTGTTTCGAGCACTACTACC-3'; gNSUN6, 5'-GACCTTCAAGATGTGTTACT-3'; gTRMT6, 5'-  
265 GGTGCAATGATGGAACGAAT-3'; gTRMT61A, 5'-TTCGGCTCCAAGGTGACGTG-3'.

266

#### 267 **m<sup>5</sup>C detection by bisulfite conversion followed by sanger sequence**

268 Total RNA was extracted by TRIzol® Reagent (Ambion). mRNA was enriched using VAHTS mRNA  
269 Capture Beads (Vazyme, #N401). 200 ng mRNA was converted by EZ RNA methylation kit (Zymo  
270 Research) according to the manufacturer's protocol with minor modification. More specifically, mRNA  
271 was incubated at 70 °C for 10 min, and 60 °C for 1 h. Converted RNA was then reverse transcribed into  
272 cDNA using HiScript II Q Select RT SuperMix (Vazyme, #R233-01).

273 To measure m<sup>5</sup>C rate in FURIN m<sup>5</sup>C reporter, target site was amplified using vector specific primer pair  
274 5'-TTGTAATTTTTTTTTTATGAGTGGTTTGGTTTTA-3' and 5'-  
275 TTAAAAATAACTAAAATCTACAACCTTATAAATCATTAACTTAA-3', and sanger-sequenced by  
276 primer 5'-TTGTAATTTTTTTTTTATGAGTGGTTTGGTTTTA-3'. For m<sup>5</sup>C detection of endogenous  
277 m<sup>5</sup>C site in RPSA, target site was amplified using primers 5'-  
278 AAATTTTAAGAGGATTTGGGAGAAGTTTTTG-3' and 5'-  
279 CAACCCTAAAATCAATAACCACAAAAACCATA-3', and sanger-sequenced by primer 5'-  
280 AAATTTTAAGAGGATTTGGGAGAAGTTTTTG-3'.

281

#### 282 **m<sup>1</sup>A detection based on mis-incorporation during reverse transcription**

283 1 µg total RNA was reverse transcribed by Hifair™ II 1st Strand cDNA Synthesis Kit (Yeasen, #  
284 11121ES60). The region flanking m<sup>1</sup>A site was amplified by plasmid specific primer 5'-  
285 TTCACCGTCACCGCCGAC-3' and 5'-CTAATTCCTCCCAACGAAGACAAGATTT-3'. The mismatch  
286 site was measured by sanger sequencing using primer 5'-CTAATTCCTCCCAACGAAGACAAGATTT-  
287 3'.

288

#### 289 **mRNA-BisSeq**

290 The quality of 500 ng bisulfite-treated mRNA (see above) was assessed using Agilent RNA 6000 Pico  
291 Kit (Agilent, #NC1711873), and then subjected to NGS libraries preparation using VAHTS Stranded



292 mRNA-seq Library Prep Kit (Vazyme). The library quality was assessed using High Sensitivity DNA Kit  
293 (Agilent, #5067-4626). Paired-end sequencing (2x150 bp) was performed with Illumina NovaSeq 6000  
294 System by Haplox genomics center. The raw sequencing data have been deposited to GEO under the  
295 accession number GSE157368.

296

### 297 **Generation of CIGAR-seq vector pool with a FURIN m<sup>5</sup>C reporter**

298 A gRNA library containing 4975 gRNA targeting 829 RBP (Table EV1) was synthesized by GENEWIZ  
299 and cloned into CROP-seq vector (Addgene, #86708) at BsmBI sites. For measuring the complexity of  
300 the gRNA library, the region harboring gRNA sequence was amplified with primer pair 5'-  
301 AATGATACGGCGACCACCGAGATCTACTCTTTCCCTACACGACGCTCTTCCGATCTCTTGTA-  
302 TATCCCTTGGAGAACCACCTTGTTG-3' and 5'-  
303 CAAGCAGAAGACGGCATAACGAGATCCACTCGTGACTGGAGTTCAGACGTGTGCTCTTCCGATCT-  
304 CGACTCGGTGCCACTTTTTCAAGTTG-3' for NGS. Afterwards, the FURIN m<sup>5</sup>C reporter was amplified  
305 and used to replace WPRE cassette using ClonExpress II One Step Cloning Kit (Vazyme). During  
306 cloning of CIGAR-seq vector pool, electrocompetent Stbl3 cells (Weidi Biotechnology, CAT#: DE1046)  
307 was always used.

308

### 309 **CIGAR-seq viral package**

310 HEK293T cells were plated onto 15 cm plates at 40% confluence. The next day, cells were transfected  
311 with PEI (Polysciences, #23966-2) using 15 µg of CIGAR-seq vector, 15 µg of psPAX2 (Addgene,  
312 #12259) and 22.5 µg of pMD2.G (Addgene, #12259). Supernatant containing viral particles were  
313 harvested at 48 h and 96 h, and purified with 0.45 µm filter.

314

### 315 **Genetic screen for novel m<sup>5</sup>C regulators**

316 2x10<sup>8</sup> HAP1 cells were infected with CIGAR-seq viral particles (MOI = 0.3) and treated with 1 µg/ml of  
317 Puromycin for 24 h post infection. Puromycin resistant cells were cultured for additional seven days,  
318 and then 2x10<sup>8</sup> HAP1 cells were collected for RNA extraction. 100 ng of bisulfite-treated mRNA (see  
319 above) was quantified using Agilent RNA 6000 Pico Kit (Agilent, #NC1711873) and reverse transcribed  
320 into cDNA using HiScript II Q Select RT SuperMix (Vazyme, #R233-01). Finally, using the cDNA,  
321 CIGAR-seq NGS library was amplified with forward primer 5'-  
322 AATGATACGGCGACCACCGAGATCTACTCTTTCCCTACACGACGCTCTTCCGATCT-

323 GGGTTGGTTTAGGAGATATTTGAGGG-3' and reverse primer 5'-  
324 CAAGCAGAAGACGGCATAACGAGATCGTGATGTGACTGGAGTTCAGACGTGTGCTCTTCCGATCT-  
325 AACAACTCCTAATACTCAAAAAAAAAAACACCA-3'. Paired-end sequencing (2x150 bp) was performed  
326 with Illumina NovaSeq 6000 System by Haplox genomics center. The raw sequencing data have been  
327 deposited to GEO under the accession number GSE157368.

328

### 329 **Western blotting**

330 Transfected HAP1 cells were collected and lysed by RIPA buffer (150 mM NaCl, 50 mM Tris, 1% EDTA,  
331 1% NP40, 0.1% SDS). Lysate was incubated at 4 °C for 30 min, then sonicated with 10 cycles (30 s On  
332 /30 s Off), and then centrifuged at 15,000 g for 15 min at 4 °C. The total protein concentration was  
333 measured by BCA (Beyotime, #P0011). 60 µg total protein was loaded and separated on the 10% SDS-  
334 polyacrylamide gel. The protein on the gel was transferred to the polyvinylidene difluoride membranes  
335 (Immobilon-P, #IPVH00010). The membrane was incubated with primary antibody and horseradish  
336 peroxidase-conjugated secondary antibody, and then proteins were detected using the Pierce™ ECL  
337 Western Blotting Substrate (Thermo, #32209) by BIO-RAD ChemiDoc™ XRS+ system. The following  
338 antibodies were used for western blotting: NSUN2 (Proteintech, #20854-1-AP), NSUN6 (Proteintech,  
339 #17240-1-AP) and GAPDH (TransGen Biotech, #N10404).

340

### 341 **Computational Methods**

#### 342 **CIGRA-seq data analysis**

343 CIGRA-seq NGS data consists of paired end reads. Read1 contains the sequence of m<sup>5</sup>C reporter site  
344 while read2 consists of the gRNA sequence. Raw fastq data were first trimmed using fastp (Chen, Zhou  
345 et al., 2018) to remove low-quality bases (-A -w 12 --length\_required 30 -q 30). Then the clean read  
346 pairs were parsed using a custom script based on pysam package. Specifically, gRNA sequence in  
347 read2 was extracted by regex module using regular expression  
348 ((CAACTTAACTCTTAAAC[ATCG]{20}CA){s<=1}). m<sup>5</sup>C reporter sequence was extracted in the similar  
349 way ((GTTATTT[TC]{1}TTTAAGG){s<=1}). At most 1 substitution was allowed during the pattern  
350 searching. Read pairs with both reads containing the matched pattern sequences and the m<sup>5</sup>C sites  
351 being C or T were kept for further analysis. Then for each gRNA sequence, the number of supported  
352 reads with reporter site being C (m<sup>5</sup>C) or T were calculated, and the number of C reads divided by the

353 sum of C and T reads represented the m<sup>5</sup>C level. Only the extracted gRNA sequences that match  
354 exactly with the RBP gRNA sequences (Table EV1) were kept for further analysis.

355 To identify the high-confident candidate genes that regulate m<sup>5</sup>C level, information of multiple gRNAs  
356 of the same genes were combined using the Stouffer's method. gRNAs with no more than 20 supported  
357 reads were filtered out. Genes with only one gRNA detected were filtered out. Then, given a gene *i*, the  
358 m<sup>5</sup>C level of reporter site correspondence to gRNA *j* is  $X_{i,j}$ . m<sup>5</sup>C level was converted to Z-score and p  
359 value  $P_{i,j}$  was calculated under normal distribution assumption. Then a combined p value for each gene  
360  $P_i$  was obtain using the weighted version of Stouffer's method, with the logarithmic scale of read count  
361 as weight for each gRNA. Finally, P values of multiple tests were adjusted with Benjamini & Hochberg's  
362 method.

363

#### 364 mRNA-BisSeq data analysis

365 mRNA-BisSeq data generated in this study were analyzed following the RNA-m<sup>5</sup>C pipeline (Huang et  
366 al., 2019) (<https://github.com/SYSU-zhanglab/RNA-m5C>). Reference genomes (GRCh38) and gene  
367 annotation GTF file was downloaded from Ensemble (<http://www.ensembl.org/info/data/ftp/index.html>).  
368 Briefly, raw paired-end reads were trimmed using cutadapt (Martin, 2011) (-a  
369 AGATCGGAAGAGCACACGTC -A AGATCGGAAGAGCGTCGTGT -j 12 -e 0.25 -q 30 --trim-n ) and  
370 then Trimmomatic(Bolger, Lohse et al., 2014) (SLIDINGWINDOW:4:25 AVGQUAL:30 MINLEN:36).  
371 Clean read pairs were aligned to both C-to-T and G-to-A converted reference genomes by HISAT2 (Kim,  
372 Paggi et al., 2019). Unmapped and multiple mapped reads were then aligned to C-to-T converted  
373 transcriptome by Bowtie2 (Langmead & Salzberg, 2012), and the transcript coordinates were liftovered  
374 to the genomic coordinates. Reads from HISAT2 and Bowite2 mapping were merged and filtered using  
375 the same criteria as in RNA-m<sup>5</sup>C pipeline. Bam file was transformed into pileup file (--trim-head 6 --trim-  
376 tail 6). Putative m<sup>5</sup>C sites were called using script m<sup>5</sup>C\_caller\_multiple.py inside RNA-m<sup>5</sup>C pipeline (with  
377 parameters -P 8 -c 20 -C 2 -r 0.05 -p 0.05 --method binomial). Default parameters of RNA-m<sup>5</sup>C scripts  
378 were used unless otherwise specified.

379

#### 380 NSUN6-dependent m<sup>5</sup>C sites

381 First, to determine a set of high-confident m<sup>5</sup>C sites in HAP1 cells, five replicates of mRNA-BisSeq data  
382 generated from the WT HAP1 cells were used. The criteria to determine the high-confident m<sup>5</sup>C sites  
383 were: (1) coverage of the site being at least 20 reads in all five replicates; (2) number of reads containing

384 the unmodified C being at least 2 in all five replicates; (3) the WT methylation level (the minimum  
385 methylation level from the five replicates) being at least 0.05. Then, to determine the NSUN6-dependent  
386 m<sup>5</sup>C sites, m<sup>5</sup>C level of the sites were at least 0.05 in WT HAP1 cells and less than 0.02 or 10% of the  
387 WT m<sup>5</sup>C level in NSUN6-KO HAP1 cells. NSUN2-dependent sites were defined based on the same  
388 criteria.

389

### 390 **Features of the m<sup>5</sup>C sites**

391 The upstream and downstream 10 bp sequences flanking the m<sup>5</sup>C sites were extracted from the genome.

392 Motif analysis was performed Using ggseqlogo (Wagih, 2017) R package.

393 **Acknowledgments**

394 This work was supported by the Shenzhen-Hong Kong Institute of Brain Science-Shenzhen  
395 Fundamental Research Institutions (Grant No. 2019SHIBS0002), Shenzhen Science and Technology  
396 Program (Grant No. KQTD20180411143432337, JCYJ20190809154407564 and  
397 JCYJ20180504165804015) and the National Natural Science Foundation of China (Grant No. 31701237,  
398 31900431 and 31970601). The authors acknowledge the Center for Computational Science and  
399 Engineering of SUSTech for the support on computational resource and acknowledge the SUSTech  
400 Core Research Facilities and Guixin Ruan for technical support.

401 **Author contributions**

402 W.C. and L.F. developed the concept of the project. W.W., L.F., L.Z., D.G., J.Y. and Y.T. designed and  
403 performed experiments. G.L. performed bioinformatic analysis. W.Z., M.Z., D.D., Z.S., Q.Z. and Z.D.  
404 assisted in performing experiments. W.C., L.F., G.L., Y.H., W.W., J.L., H.C. and W.S. reviewed and  
405 discussed results. W.C., L.F., G.L. and W.W. wrote the manuscript.

406 **Reference**

407

- 408 Adamson B, Norman TM, Jost M, Cho MY, Nunez JK, Chen Y, Villalta JE, Gilbert LA, Horlbeck MA,  
409 Hein MY, Pak RA, Gray AN, Gross CA, Dixit A, Parnas O, Regev A, Weissman JS (2016) A Multiplexed  
410 Single-Cell CRISPR Screening Platform Enables Systematic Dissection of the Unfolded Protein  
411 Response. *Cell* 167: 1867-1882 e21
- 412 Agris PF (2008) Bringing order to translation: the contributions of transfer RNA anticodon-domain  
413 modifications. *EMBO Rep* 9: 629-35
- 414 Bokar JA, Rath-Shambaugh ME, Ludwiczak R, Narayan P, Rottman F (1994) Characterization and  
415 partial purification of mRNA N6-adenosine methyltransferase from HeLa cell nuclei. Internal mRNA  
416 methylation requires a multisubunit complex. *J Biol Chem* 269: 17697-704
- 417 Bokar JA, Shambaugh ME, Polayes D, Matera AG, Rottman FM (1997) Purification and cDNA cloning  
418 of the AdoMet-binding subunit of the human mRNA (N6-adenosine)-methyltransferase. *RNA* 3: 1233-  
419 47
- 420 Bolger AM, Lohse M, Usadel B (2014) Trimmomatic: a flexible trimmer for Illumina sequence data.  
421 *Bioinformatics* 30: 2114-20
- 422 Chen S, Zhou Y, Chen Y, Gu J (2018) fastp: an ultra-fast all-in-one FASTQ preprocessor. *Bioinformatics*  
423 34: i884-i890
- 424 Datlinger P, Rendeiro AF, Schmidl C, Krausgruber T, Traxler P, Klughammer J, Schuster LC, Kuchler  
425 A, Alpar D, Bock C (2017) Pooled CRISPR screening with single-cell transcriptome readout. *Nat*  
426 *Methods* 14: 297-301
- 427 David R, Burgess A, Parker B, Li J, Pulsford K, Sibbritt T, Preiss T, Searle IR (2017) Transcriptome-  
428 Wide Mapping of RNA 5-Methylcytosine in Arabidopsis mRNAs and Noncoding RNAs. *Plant Cell* 29:  
429 445-460
- 430 Dixit A, Parnas O, Li B, Chen J, Fulco CP, Jerby-Aron L, Marjanovic ND, Dionne D, Burks T,  
431 Raychowdhury R, Adamson B, Norman TM, Lander ES, Weissman JS, Friedman N, Regev A (2016)  
432 Perturb-Seq: Dissecting Molecular Circuits with Scalable Single-Cell RNA Profiling of Pooled Genetic  
433 Screens. *Cell* 167: 1853-1866 e17
- 434 Dominissini D, Nachtergaele S, Moshitch-Moshkovitz S, Peer E, Kol N, Ben-Haim MS, Dai Q, Di Segni  
435 A, Salmon-Divon M, Clark WC, Zheng G, Pan T, Solomon O, Eyal E, Hershkovitz V, Han D, Dore LC,  
436 Amariglio N, Rechavi G, He C (2016) The dynamic N(1)-methyladenosine methylome in eukaryotic  
437 messenger RNA. *Nature* 530: 441-6
- 438 Edelheit S, Schwartz S, Mumbach MR, Wurtzel O, Sorek R (2013) Transcriptome-wide mapping of 5-  
439 methylcytidine RNA modifications in bacteria, archaea, and yeast reveals m5C within archaeal mRNAs.  
440 *PLoS Genet* 9: e1003602
- 441 Guallar D, Bi X, Pardavila JA, Huang X, Saenz C, Shi X, Zhou H, Faiola F, Ding J, Haruehanroengra P,  
442 Yang F, Li D, Sanchez-Priego C, Saunders A, Pan F, Valdes VJ, Kelley K, Blanco MG, Chen L, Wang  
443 H et al. (2018) RNA-dependent chromatin targeting of TET2 for endogenous retrovirus control in  
444 pluripotent stem cells. *Nat Genet* 50: 443-451
- 445 Haag S, Warda AS, Kretschmer J, Gunnigmann MA, Hobartner C, Bohnsack MT (2015) NSUN6 is a  
446 human RNA methyltransferase that catalyzes formation of m5C72 in specific tRNAs. *RNA* 21: 1532-43
- 447 Hanna RE, Doench JG (2020) Design and analysis of CRISPR-Cas experiments. *Nat Biotechnol*  
448 Hauenschild R, Tserovski L, Schmid K, Thuring K, Winz ML, Sharma S, Entian KD, Wacheul L,  
449 Lafontaine DL, Anderson J, Alfonzo J, Hildebrandt A, Jaschke A, Motorin Y, Helm M (2015) The reverse  
450 transcription signature of N-1-methyladenosine in RNA-Seq is sequence dependent. *Nucleic Acids Res*  
451 43: 9950-64
- 452 Helm M (2006) Post-transcriptional nucleotide modification and alternative folding of RNA. *Nucleic Acids*  
453 *Res* 34: 721-33
- 454 Huang T, Chen W, Liu J, Gu N, Zhang R (2019) Genome-wide identification of mRNA 5-methylcytosine  
455 in mammals. *Nat Struct Mol Biol* 26: 380-388
- 456 Hussain S, Sajini AA, Blanco S, Dietmann S, Lombard P, Sugimoto Y, Paramor M, Gleeson JG, Odom  
457 DT, Ule J, Frye M (2013) NSun2-mediated cytosine-5 methylation of vault noncoding RNA determines  
458 its processing into regulatory small RNAs. *Cell Rep* 4: 255-61
- 459 Khoddami V, Cairns BR (2013) Identification of direct targets and modified bases of RNA cytosine  
460 methyltransferases. *Nat Biotechnol* 31: 458-64
- 461 Kim D, Paggi JM, Park C, Bennett C, Salzberg SL (2019) Graph-based genome alignment and  
462 genotyping with HISAT2 and HISAT-genotype. *Nat Biotechnol* 37: 907-915
- 463 Langmead B, Salzberg SL (2012) Fast gapped-read alignment with Bowtie 2. *Nat Methods* 9: 357-9

464 Li J, Li H, Long T, Dong H, Wang ED, Liu RJ (2019) Archaeal NSUN6 catalyzes m<sup>5</sup>C72 modification on  
465 a wide-range of specific tRNAs. *Nucleic Acids Res* 47: 2041-2055  
466 Li Q, Li X, Tang H, Jiang B, Dou Y, Gorospe M, Wang W (2017) NSUN2-Mediated m<sup>5</sup>C Methylation  
467 and METTL3/METTL14-Mediated m<sup>6</sup>A Methylation Cooperatively Enhance p21 Translation. *J Cell*  
468 *Biochem* 118: 2587-2598  
469 Li X, Xiong X, Zhang M, Wang K, Chen Y, Zhou J, Mao Y, Lv J, Yi D, Chen XW, Wang C, Qian SB, Yi  
470 C (2017) Base-Resolution Mapping Reveals Distinct m(1)A Methylome in Nuclear- and Mitochondrial-  
471 Encoded Transcripts. *Mol Cell* 68: 993-1005 e9  
472 Linder B, Grozhik AV, Olarerin-George AO, Meydan C, Mason CE, Jaffrey SR (2015) Single-nucleotide-  
473 resolution mapping of m<sup>6</sup>A and m<sup>6</sup>Am throughout the transcriptome. *Nat Methods* 12: 767-772  
474 Liu J, Yue Y, Han D, Wang X, Fu Y, Zhang L, Jia G, Yu M, Lu Z, Deng X, Dai Q, Chen W, He C (2014)  
475 A METTL3-METTL14 complex mediates mammalian nuclear RNA N<sup>6</sup>-adenosine methylation. *Nat*  
476 *Chem Biol* 10: 93-5  
477 Luo Y, Feng J, Xu Q, Wang W, Wang X (2016) NSun2 Deficiency Protects Endothelium From  
478 Inflammation via mRNA Methylation of ICAM-1. *Circ Res* 118: 944-56  
479 Machnicka MA, Milanowska K, Osman Oglou O, Purta E, Kurkowska M, Olchowik A, Januszewski W,  
480 Kalinowski S, Dunin-Horkawicz S, Rother KM, Helm M, Bujnicki JM, Grosjean H (2013) MODOMICS: a  
481 database of RNA modification pathways--2013 update. *Nucleic Acids Res* 41: D262-7  
482 Martin M (2011) Cutadapt removes adapter sequences from high-throughput sequencing reads. 2011  
483 17: 3 %J EMBnet.journal  
484 Roundtree IA, Evans ME, Pan T, He C (2017) Dynamic RNA Modifications in Gene Expression  
485 Regulation. *Cell* 169: 1187-1200  
486 Safra M, Sas-Chen A, Nir R, Winkler R, Nachshon A, Bar-Yaacov D, Erlacher M, Rossmannith W, Stern-  
487 Ginossar N, Schwartz S (2017) The m<sup>1</sup>A landscape on cytosolic and mitochondrial mRNA at single-  
488 base resolution. *Nature* 551: 251-255  
489 Schaefer M, Pollex T, Hanna K, Lyko F (2009) RNA cytosine methylation analysis by bisulfite  
490 sequencing. *Nucleic Acids Res* 37: e12  
491 Schumann U, Zhang HN, Sibbritt T, Pan A, Horvath A, Gross S, Clark SJ, Yang L, Preiss T (2020)  
492 Multiple links between 5-methylcytosine content of mRNA and translation. *BMC Biol* 18: 40  
493 Shen Q, Zhang Q, Shi Y, Shi Q, Jiang Y, Gu Y, Li Z, Li X, Zhao K, Wang C, Li N, Cao X (2018) Tet2  
494 promotes pathogen infection-induced myelopoiesis through mRNA oxidation. *Nature* 554: 123-127  
495 Squires JE, Patel HR, Nousch M, Sibbritt T, Humphreys DT, Parker BJ, Suter CM, Preiss T (2012)  
496 Widespread occurrence of 5-methylcytosine in human coding and non-coding RNA. *Nucleic Acids Res*  
497 40: 5023-33  
498 Trixl L, Lusser A (2019) Getting a hold on cytosine methylation in mRNA. *Nat Struct Mol Biol* 26: 339-  
499 340  
500 Wagih O (2017) ggseqlogo: a versatile R package for drawing sequence logos. *Bioinformatics* 33: 3645-  
501 3647  
502 Wheeler EC, Vu AQ, Einstein JM, DiSalvo M, Ahmed N, Van Nostrand EL, Shishkin AA, Jin W, Allbritton  
503 NL, Yeo GW (2020) Pooled CRISPR screens with imaging on microarray reveals stress granule-  
504 regulatory factors. *Nat Methods* 17: 636-642  
505 Xiao Y, Wang Y, Tang Q, Wei L, Zhang X, Jia G (2018) An Elongation- and Ligation-Based qPCR  
506 Amplification Method for the Radiolabeling-Free Detection of Locus-Specific N(6) -Methyladenosine  
507 Modification. *Angew Chem Int Ed Engl* 57: 15995-16000  
508 Yan X, Stuurman N, Ribeiro SA, Tanenbaum ME, Horlbeck MA, Liem CR, Jost M, Weissman JS, Vale  
509 RD (2020) High-content Imaging-based Pooled CRISPR Screens in Mammalian Cells. *bioRxiv*  
510 Yang X, Yang Y, Sun BF, Chen YS, Xu JW, Lai WY, Li A, Wang X, Bhattarai DP, Xiao W, Sun HY, Zhu  
511 Q, Ma HL, Adhikari S, Sun M, Hao YJ, Zhang B, Huang CM, Huang N, Jiang GB et al. (2017a) 5-  
512 methylcytosine promotes mRNA export - NSUN2 as the methyltransferase and ALYREF as an m(5)C  
513 reader. *Cell Res* 27: 606-625  
514 Yang X, Yang Y, Sun BF, Chen YS, Xu JW, Lai WY, Li A, Wang X, Bhattarai DP, Xiao W, Sun HY, Zhu  
515 Q, Ma HL, Adhikari S, Sun M, Hao YJ, Zhang B, Huang CM, Huang N, Jiang GB et al. (2017b) 5-  
516 methylcytosine promotes mRNA export-NSUN2 as the methyltransferase and ALYREF as an m(5)C  
517 reader. *Cell Res* 27: 606-625  
518 Zhao LY, Song J, Liu Y, Song CX, Yi C (2020) Mapping the epigenetic modifications of DNA and RNA.  
519 *Protein Cell*  
520



521 **Figure legends**

522 **Figure 1. CIGAR-seq identified NSUN6 as a novel mRNA methyltransferase.** **A**, An illustration of  
523 CIGAR-seq method in studying m<sup>5</sup>C modification. The WPRE cassette on the original CROP-seq vector  
524 was replaced by an endogenous m<sup>5</sup>C site with its flanking region. To measure the m<sup>5</sup>C level of the  
525 reporter site in gRNA sequence-containing transcripts, mRNA was subjected to bisulfite treatment  
526 followed by reverse transcription. Then, a primer pair flanking the m<sup>5</sup>C site and gRNA sequence was  
527 used to amplify the region for subsequent Sanger or next-generation sequencing. **B**, Validation of  
528 CIGAR-seq method using a m<sup>5</sup>C reporter site derived from FAM129B gene with a control gRNA without  
529 target genes and a gRNA targeting NSUN2. Upon NSUN2 knockout, the m<sup>5</sup>C modification is diminished  
530 in the FAM129B reporter mRNA, whereas the modification remains intact in control knockout cells. **C**,  
531 The application of CIGAR-seq in screening for regulators of m<sup>5</sup>C sites. Cas9-expressing HAP1 cells  
532 were transduced with viral particles that express Cigar vectors combining NSUN2-independent m<sup>5</sup>C  
533 reporter sites derived from FURIN gene and a gRNA library targeting 829 RBPs. Seven days after  
534 transduction, enriched polyA RNA was bisulfite-treated, reverses-transcribed and PCR-amplified using  
535 primers flanking the m<sup>5</sup>C site and gRNA sequence to generate NGS library. **D**, The rank of gene whose  
536 knockout reduced m<sup>5</sup>C modification rate of the reporter site (Methods). NSUN6 was the top hit. **E**,  
537 Validation of NSUN6 as a mRNA m<sup>5</sup>C methyltransferase. Knockout as well as knockdown NSUN6  
538 reduced the m<sup>5</sup>C level in both FURIN m<sup>5</sup>C reporter transcripts and endogenous NSUN2-independent  
539 m<sup>5</sup>C sites in RPSA gene.

540

541 **Figure 2. Global profiling of NSUN6-dependent m<sup>5</sup>C sites.** **A**, mRNA bisulfite sequencing revealed  
542 NSUN6-dependent m<sup>5</sup>C sites in HAP1 cells. Of 208 m<sup>5</sup>C sites identified in wildtype cells, 65 showed  
543 significantly reduced modification in NSUN6 knocked out cells. X and Y axis represented the  
544 modification rate in wildtype and NSUN6 knocked out HAP1 cells, respectively. **B**, The sequence  
545 features of NSUN6-dependent m<sup>5</sup>C sites in HAP1 cells. A strong 3' TCCA motif was found in NSUN6-  
546 dependent sites.

547

548 **Figure 3. Comparison between NSUN6- and NSUN2-dependent m<sup>5</sup>C modification sites.** **A**, The  
549 largely non-overlap between NSUN2- and NSUN6-dependent m<sup>5</sup>C sites. **B**, Heatmap showing the m<sup>5</sup>C  
550 modification rate in wildtype, NSUN2-KO, NSUN6-KO and NSUN2/6-dKO HAP1 cells for NSUN6-

551 (upper panel) and NSUN2-dependent sites (lower panel), respectively. **C**, The sequence features of  
552 NSUN6-only- (upper panel) and NSUN2-only-dependent m<sup>5</sup>C sites (lower panel) in HAP1 cells. While  
553 NSUN6-dependent sites were strongly enriched for 3' TCCA motif, NSUN2-dependent sites were  
554 enriched for 3' NGGG motif. **D**, The modification rate of 4 groups of m<sup>5</sup>C sites that showed different  
555 dependence. Comparing to the other three groups, the group of three overlapping sites showed very  
556 low m<sup>5</sup>C level. **E**, Modification rate of NSUN6- and NSUN2-dependent m<sup>5</sup>C sites across different  
557 tissues.

558

559 **Figure 4. Exemplar application of CIGAR-seq in the study of m<sup>1</sup>A modification.** **A**, An illustration  
560 of CIGAR-seq vector designed for m<sup>1</sup>A modification. A known TRMT6/61A complex-dependent m<sup>1</sup>C site  
561 in MALAT1 gene was cloned into CIGAR-seq vector, together with control gRNA as well as gRNAs  
562 targeting TRMT6 and TRMT61A, respectively. **B&C**, Upon perturbation of either TRMT6 or TRMT61A  
563 in HAP1 cells, the m<sup>1</sup>A modification was completely abolished in m<sup>1</sup>A reporter site, whereas the  
564 modification remains intact in control knockout cells.

565 **Figure Legends of supplementary figures**

566 **Figure EV1. NSUN2 Knock out and the effect on the reporter as well as endogenous m<sup>5</sup>C sites.**

567 **A**, The NSUN2 KO efficiency in Cas9-expressing HAP1 cells. Seven days after viral transduction,  
568 NSUN2 was efficiently mutated. **B**, Scatter plot demonstrating the effect of NSUN2 knocked out in HAP1  
569 cells. 208 m<sup>5</sup>C sites were identified in wildtype HAP1 cells, 90 (43.3%) of which showed significantly  
570 reduced m<sup>5</sup>C level in NSUN2-KO cells. **C**, Distribution of genes with different number of gRNAs detected.  
571 **D**, Distribution of m<sup>5</sup>C level of the reporter site associated with individual gRNA.

572

573 **Figure EV2. NSUN6 was efficiently knocked out or knocked down. A**, The KO efficiency of NSUN6

574 in Cas9-expressing HAP1 cells. Seven days after viral transduction, NSUN6 was efficiently mutated. **B**,  
575 The knockdown efficiency of NSUN6 in HAP1 cells.

576

577 **Figure EV3. mRNA-BisSeq profiles of the three m<sup>5</sup>C modification sites depend on both NSUN6**

578 **and NSUN2**. IGV plots showing the m<sup>5</sup>C sites in ANGEL1, ZNF707 and STRN4 genes. The m<sup>5</sup>C sites  
579 in ANGEL1 (**A**) and ZNF707 (**B**) possessed a 3' TCCA and a 3' AGGG motif, respectively, while the  
580 m<sup>5</sup>C site in STRN4 was among a cluster of "pseudo" m<sup>5</sup>C sites (**C**).

581

582 **Figure EV4. KO of NSUN2 and/or NSUN6 in HAP1 cells**. Western Blot demonstrating the effect

583 NSUN2 (**A**), NSUN6 (**B**) as well as NSUN2/6 double knockout (**C**). NSUN2/6 double knockout  
584 (NSUN2/6-dKO) HAP1 cells were established based on clonal NSUN6-KO cells.

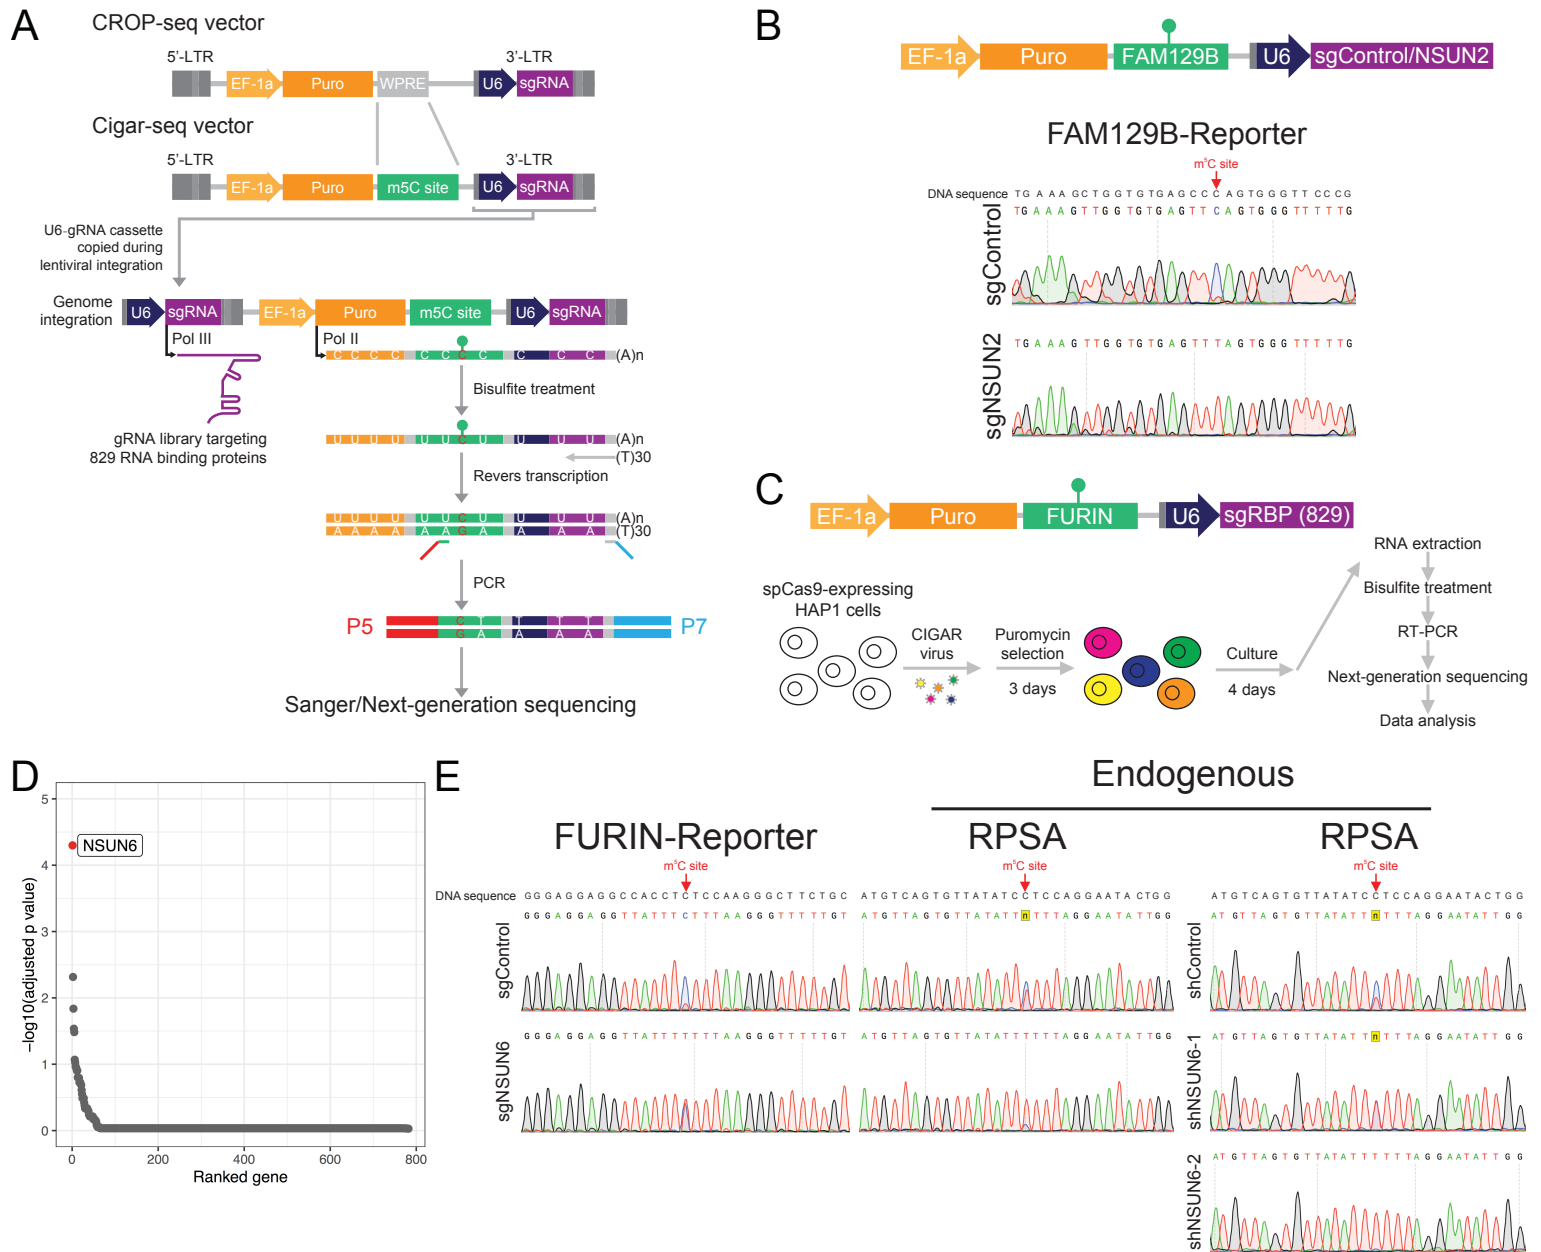

Figure 1

A

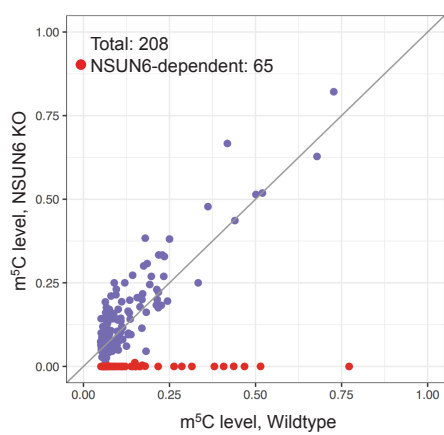

B

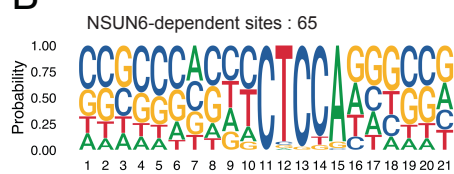

Figure 2

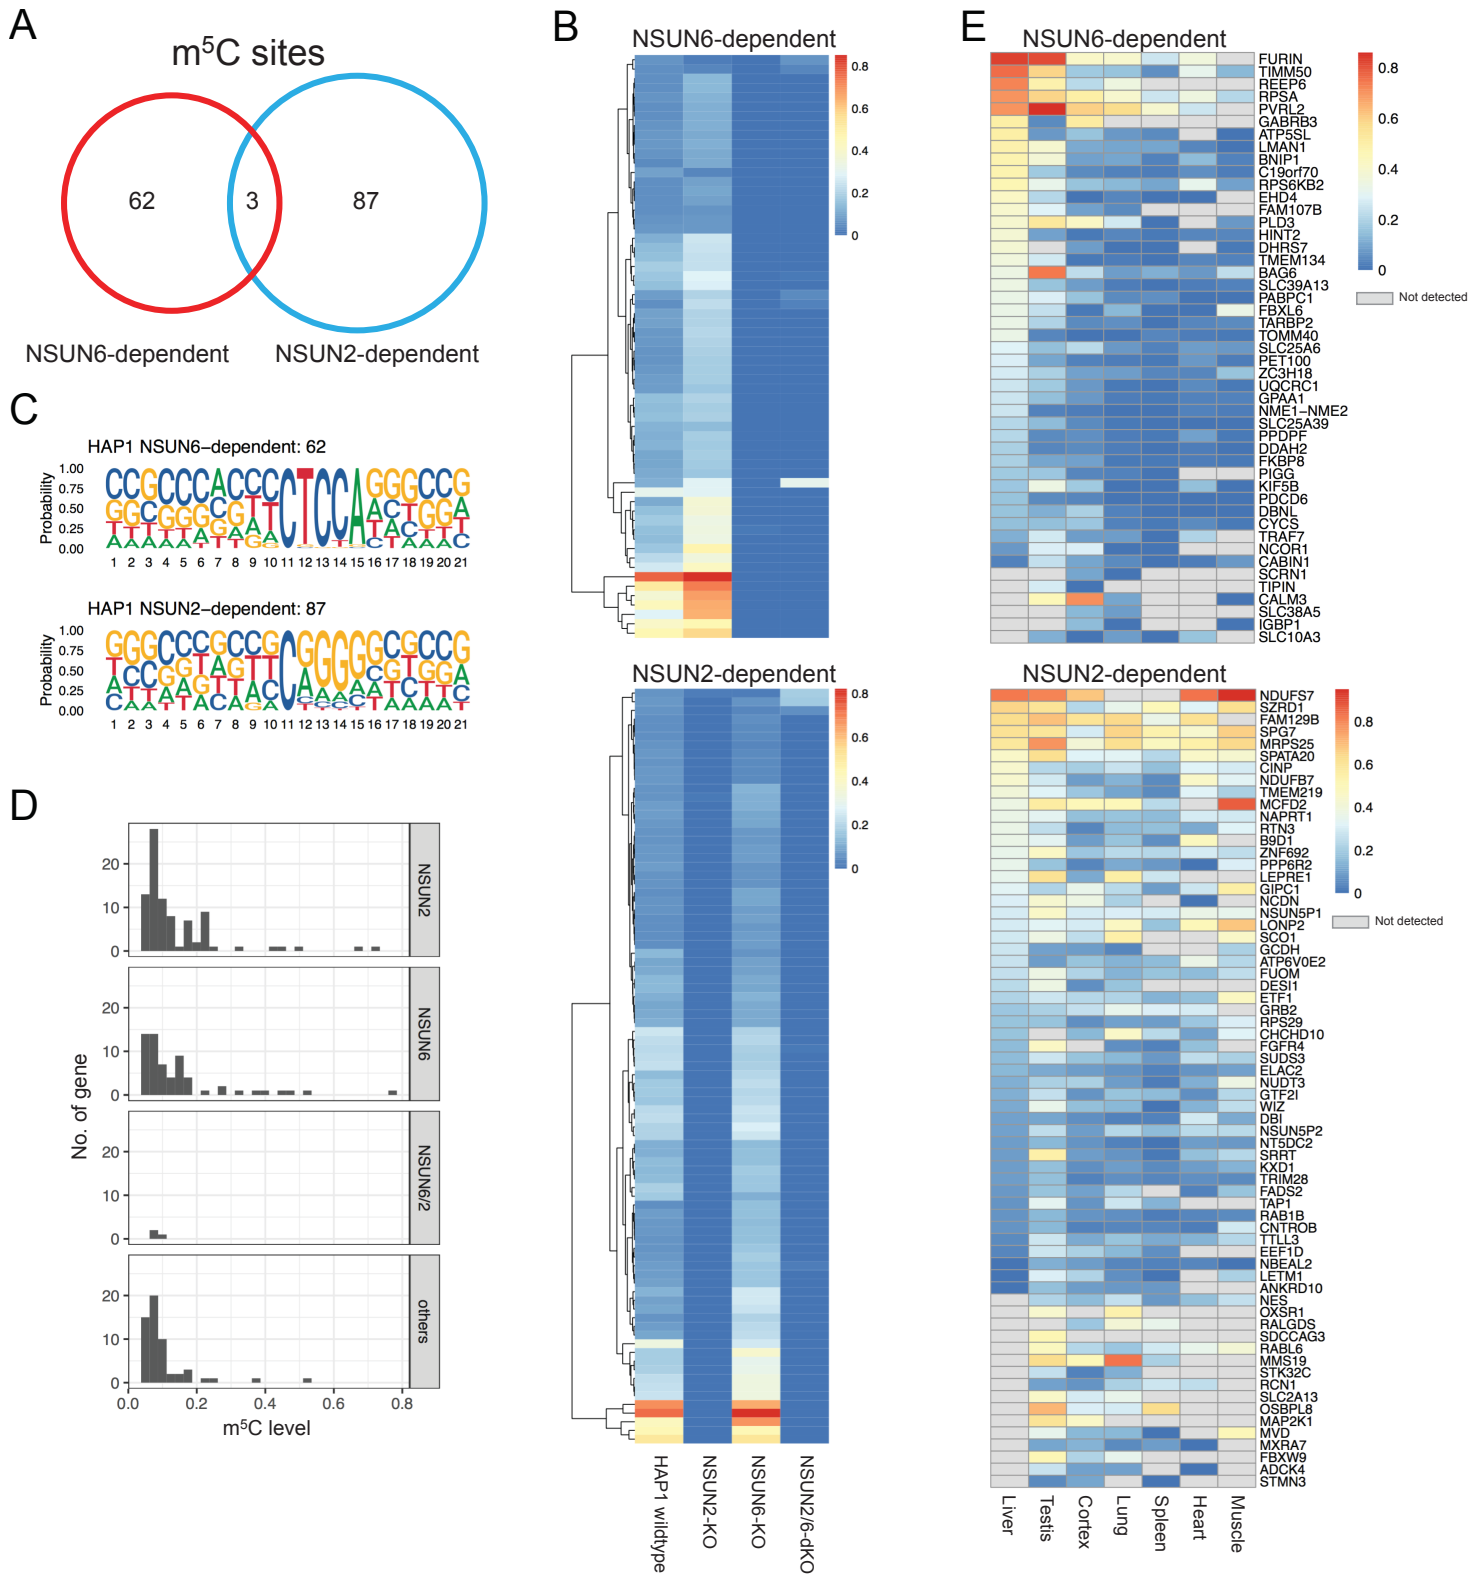

Figure 3

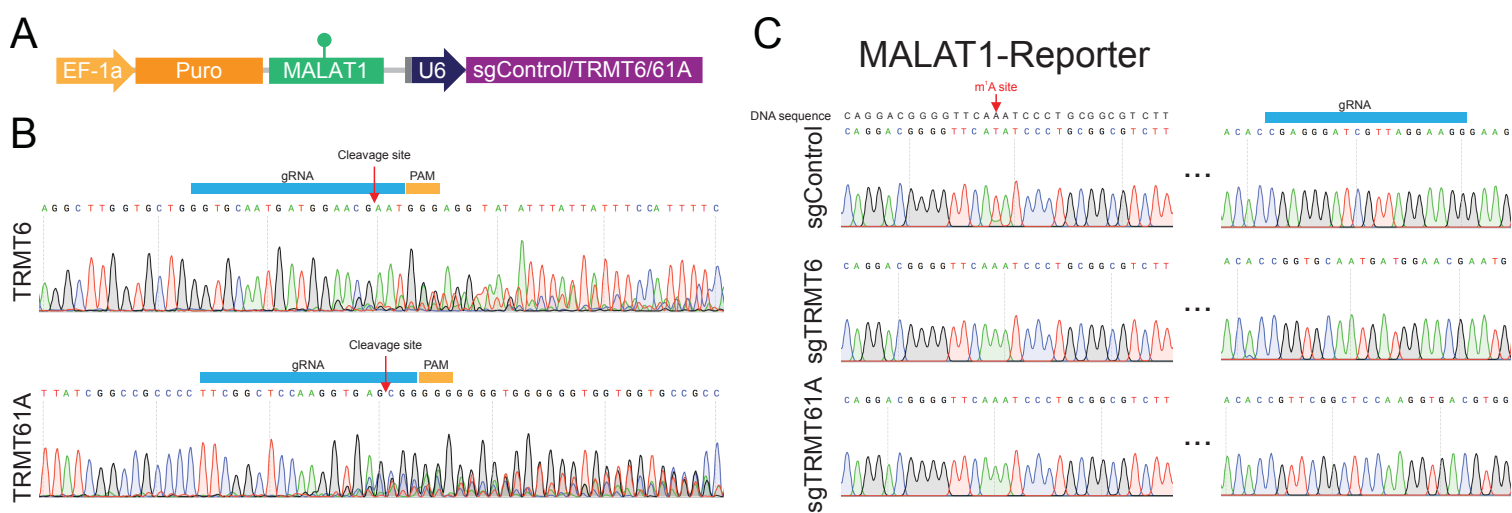

Figure 4

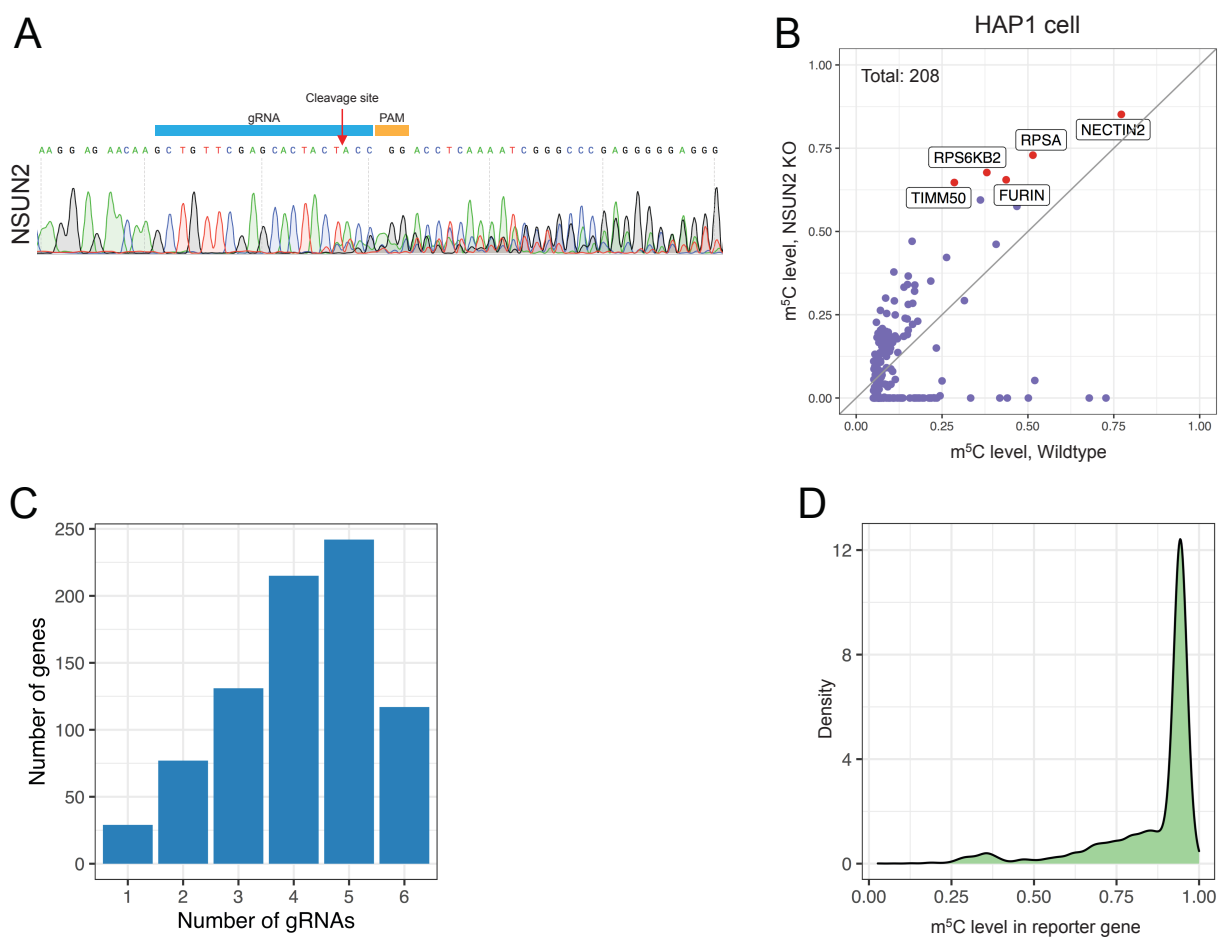

Figure EV1



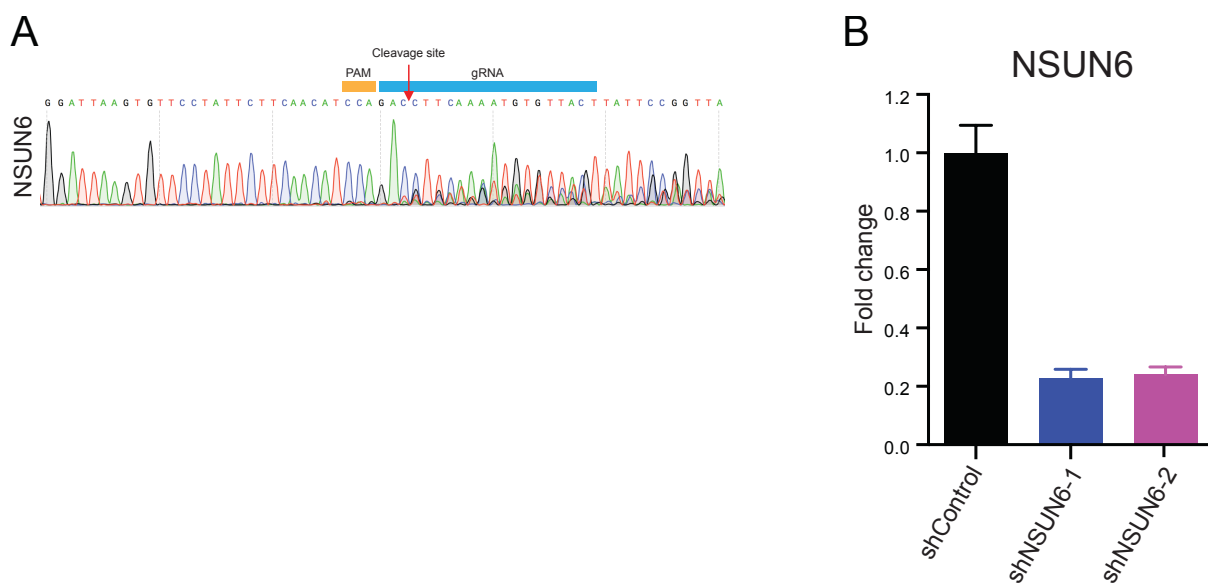

Figure EV2

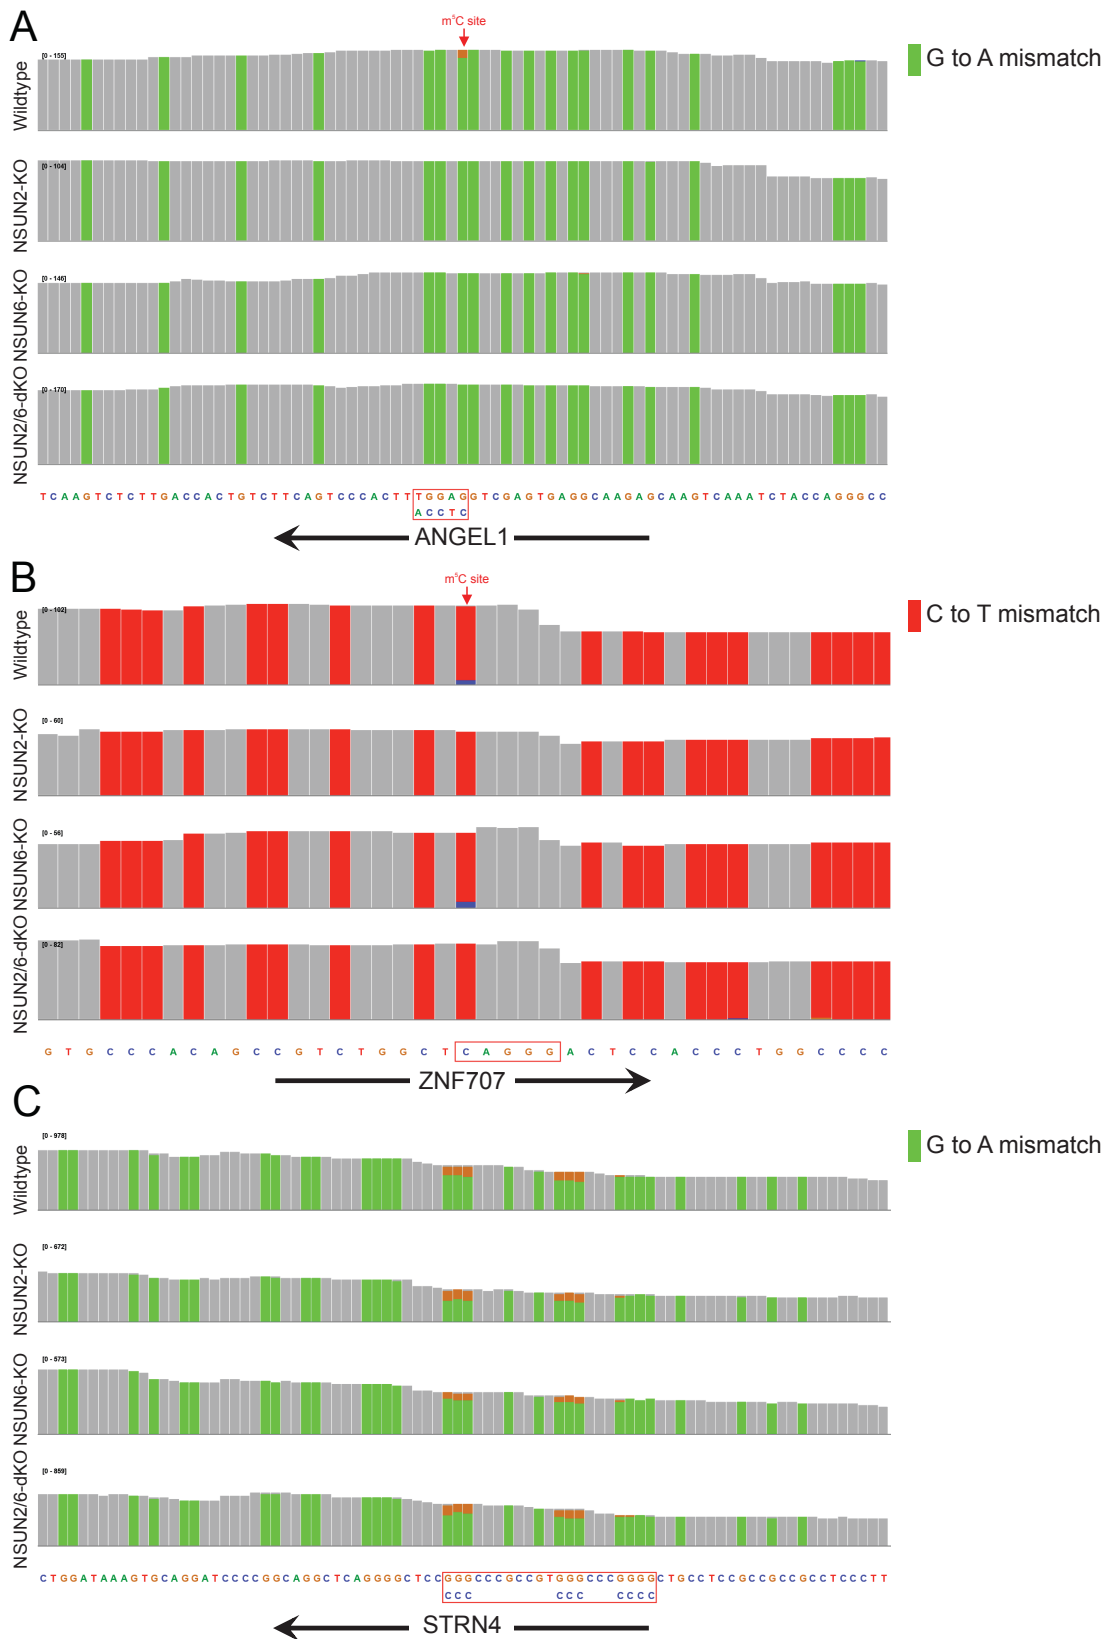

Figure EV3

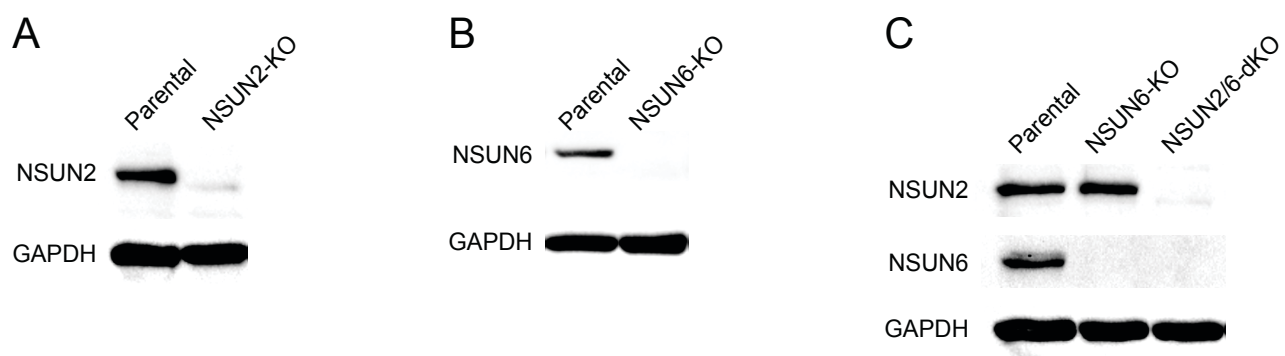

Figure EV4
